# Supplementary material for: Clinical Research Knowledge of Medical Graduates in Japan: A Pilot Study
Source: Research Square preprint supplement (doi:10.21203/rs.3.rs-7699884/v1), 2025-12-01
Supplement: Supplementary file 1 [file 29e68b94a3a34cc34d612d2f.docx]

# Appendix: Clinical Research Knowledge Questions

The following five multiple-choice questions were used to assess participants’ knowledge of clinical research. Correct answers are indicated below each question.

1. Q1. [Common] When scientific thinking in clinical research is arranged in order, which of the following comes in third?

   (1) State conclusions
   (2) Identify questions and issues
   (3) Conduct experiments
   (4) Make hypotheses
   (5) Describe methods
   (6) Investigate papers, etc.
   (7) Collect and observe data

- 1. ② Identify questions and issues
- 2. ④ Make hypotheses
- 3. ⑤ Describe methods
- 4. ⑥ Investigate papers

Correct answer: 2 (④ Make hypotheses)

1. Q2. [Common] What would be the highest priority when there is a conflict of interest in a clinical research plan?

- 1. Social benefits of research questions
- 2. Safety of the research subjects
- 3. The limit of the funds
- 4. Evaluation of scientific efficacy

Correct answer: 2

1. Q3. [Researcher] Select the correct answer from the following:

- 1. Examinations conducted for research purposes are approved as insurance-covered medical care even if outside normal care, if they are ordinarily insured practices.
- 2. In advancing clinical research, we disclosed conflicts of interest and actively cooperated with companies.
- 3. In the clinical trial, the combined medical treatment expense without insurance is not approved.
- 4. In advanced medical care, the combined medical treatment expense is not approved.

Correct answer: 4

1. Q4. [Ethics] Select the incorrect answer about clinical research and medical practice:

- 1. The responsibility of a physician in the consultation is “patient’s treatment.”
- 2. The purpose of the patient and of the physician is consistent in the consultation.
- 3. The purpose of clinical research is to benefit the patient in front of them.
- 4. Findings from clinical research will be useful for future medical care and diagnosis.

Correct answer: 3

1. Q5. [Ethics] Select the correct description of the three principles of research ethics:

- 1. Informed consent embodies the principle of respect for independency.
- 2. Risk–benefit assessment embodies the principle of beneficence.
- 3. The fair choice of the subjects embodies the principle of justice.
- 4. All of the above

Correct answer: 4
