# Supplementary material for: Clinical Research Knowledge of Medical Graduates in Japan: A Pilot Study
Source: Research Square preprint supplement (doi:10.21203/rs.3.rs-7699884/v1), 2025-12-01
Supplement: Supplementary file 2 [file 98d0508cc07c659327dfe26c.docx]

**Table S1**. Knowledge test

| No | Questions | Correct answer | Choice | Multiple Choice Answers |
| --- | --- | --- | --- | --- |
| 1 | 【Common】 When the following processes of scientific thinking in clinical research are arranged in order, which of the following should come in the third place? |  |  |  |
| (1) State conclusions, (2) identify questions and issues, (3) conduct experiments, (4) make hypotheses, (5) describe methods, (6) investigate papers, etc. (7) Collecting and observing data |  | 1 | ② |
| 〇 | 2 | ④ |
|  | 3 | ⑤ |
|  | 4 | ⑥ |
| 2 | 【Common】 What is the most correct interpretation of the Japanese Clinical Research Act? | 〇 | 1 | So-called observational studies are not covered by this act. |
|  | 2 | All clinical research funded by pharmaceutical manufacturers and distributors falls under specified clinical research. |
|  | 3 | More clearly defined invasive and intervention study |
|  | 4 | All of the above |
| 3 | 【Common】Which is the most unfit case to use specified clinical research as an exit strategy for research results? |  | 1 | The process of constructing evidence for comparing the result of existing and new medical care |
|  | 2 | The process of developing unapproved medical devices and aiming for regulatory approval |
| 〇 | 3 | The process of constructing evidence on the actual selection of multiple existing medical care |
|  | 4 | The process of developing off-label drugs and aiming for regulatory approval |
| 4 | 【Common】 What would be the highest priority when there is a conflict of interest in a clinical research plan? |  | 1 | Social benefits of research questions |
| 〇 | 2 | Safety of the research subjects |
|  | 3 | The limit of the funds |
|  | 4 | Evaluation of scientific efficacy |
| 5 | 【Common】 Which is the most inappropriate boundary between medical practice and research? | 〇 | 1 | There are objective and approval definitions, and clinical research methods use the latter in addition to the former. |
|  | 2 | Research guidelines are intended to minimize exploitability in clinical research |
|  | 3 | The outline of an act cannot distinguish between the two. |
|  | 4 | The appropriateness of the clinical research method is judged not only in the outline of the act but also in the contents of the research plan execution. |
| 6 | 【Common】 Which of the following is the most inappropriate practice in clinical research quality management? |  | 1 | Quality control and quality assurance should be done by the same person in the same clinical study. |
| 〇 | 2 | Researchers being involved in the quality control process of their own research. |
|  | 3 | Quality management not being initiated from the research planning stage and only after research initiation. |
|  | 4 | Not reviewing research results (reports, papers, etc.) charts before data analysis. |
| 7 | 【Common】 Which is the most appropriate for explaining the risk benefit balance in the study? |  | 1 | In order to balance the efficacy and side effects of pharmaceuticals, the appropriate dose usage was set. |
|  | 2 | The research design was changed to balance the accuracy and cost of the tests used in the research. |
|  | 3 | In order to balance the scientific and ethicality of placebo use, consent was explained in advance. |
| 〇 | 4 | All of the above |
| 8 | 【Common】 Which of the following is the most desirable communication skill for clinical research planning? |  | 1 | Constructive proposals and coordinated exchanges of views with other participants |
|  | 2 | Respect for the roles of other participants |
|  | 3 | Keep the motivation to create a better clinical research plan |
| 〇 | 4 | All of the above |
| 9 | 【Researcher】From the following statements, please select one that is most true for clinical research. |  | 1 | In advancing clinical research, researchers should not only formulate research plans, but also perform a wide range of tasks such as data entry, data management, and analysis on their own. |
|  | 2 | “Person in charge of research and development planning support” means a person who smoothly conducts clinical research based on knowledge and methods related to the systematic and efficient operation and management of clinical research. |
| 〇 | 3 | Multi-disciplinary collaboration is an important factor for the success of clinical research. |
|  | 4 | It is not necessary to register with The Japan Registry of Clinical Trials (jRCT) to start specified clinical research under the Clinical Research Act. |
| 10 | 【Researcher】From the following statements, please select one that is most true for clinical research. |  | 1 | All clinical research supporters are clinical research professionals and may be considered to have the same level of understanding of the research plan as the researchers themselves. |
|  | 2 | Positioning in the society of research is not very important for research supporters. |
| 〇 | 3 | To deepen the understanding of the research content, we explained the it to the research supporters based on FINER. |
|  | 4 | PICO C is an acronym for Competency. |
| 11 | 【Researcher】From the following statements, please select one that is most true for clinical research. |  | 1 | The difference between specified clinical research and physician-led clinical trials is whether or not they are funded by corporate companies. |
|  | 2 | PPI (Patient and public involvement) is a patient-requested medical treatment. |
|  | 3 | Specified clinical research needs to be carried out in accordance with the GCP stipulated by laws and regulations. |
| 〇 | 4 | None of the above |
| 12 | 【Researcher】From the following statements, please select one that is most true for clinical research. |  | 1 | Examinations conducted for research purposes are approved as insurance-covered medical care even if it is outside normal medical care if they are ordinarily insured medical practice. |
| 〇 | 2 | In advancing clinical research, we disclose conflicts of interest and actively cooperate with companies. |
|  | 3 | In a clinical trial, the combined medical treatment expense without insurance is not approved. |
|  | 4 | In advanced medical care, the combined medical treatment expense is not approved. |
| 13 | 【PM】Which of the following statements is correct about the project manager (PM)? |  | 1 | The person in charge of coordination management practice in the Clinical Research Act is completely synonymous with PM. |
|  | 2 | The PM only needs knowledge of schedule management. |
| 〇 | 3 | The PM often becomes the person in charge of coordination management practice in the process of clinical research when planning and carrying out clinical research. |
|  | 4 | The PM cannot be in charge of research and development planning support in clinical research methods when planning and conducting clinical research. |
| 14 | 【PM】Which is the correct role of the PM in clinical research? |  | 1 | The PM plays a role in summarizing clinical research with the principal investigator. |
| 〇 | 2 | The PM is responsible for understanding the goals of the principal investigator, mediating for communication between each job, and coordinating the team toward the same GOAL. |
|  | 3 | The PM does not need to be involved in the planning of sample size design, monitoring, or data management. |
|  | 4 | The PM is responsible for creating the protocol themselves if the principal investigator is unable to create the protocol. |
| 15 | 【PM】Select the appropriate matters to be addressed by the PM at the time of launch of clinical research. |  | 1 | Ask researchers to prepare a complete execution plan. |
| 〇 | 2 | Confirm with researchers the purpose of clinical research to be conducted at the initial stage (academic research or practical research, etc.) and propose and discuss countermeasures. |
|  | 3 | Based on the clinical questions proposed by researchers, prepare a framework for the execution plan without consulting other research collaborators. |
|  | 4 | None of the above |
| 16 | 【PM】Which of the following is an appropriate response of the PM for risk management in clinical research? |  | 1 | Although the monitor pointed out the possibility of variations between the doctors in the secondary evaluation items, as a result of consultation with the parties concerned, since it was also implemented in clinical practice and it would not have a significant impact on the results of this clinical research, we decided not to take special measures. |
|  | 2 | It is desirable to identify potential risks, consider the probability and impact of occurrence, prioritize each response, and decide under the agreement of the parties concerned. If the impact of the risk is low, it is possible to accept the occurrence of the risk without taking any special action. |
|  | 3 | Even after starting clinical research, it is desirable to review the risks and countermeasures that may arise as appropriate while collecting ideas from parties concerned. |
| 〇 | 4 | All of the above |
| 17 | 【PM】Select the appropriate response of the PM in the preparation of the outline of the implementation plan. |  | 1 | Although I was not familiar with the methodology proposed by the person in charge of statistics about sample size designing, I respect the opinions of statistical experts and accepted them as they were. |
|  | 2 | Although there were multiple items of secondary evaluation proposed by researchers including items unrelated to research questions, and there was a small burden on the research subjects, we respected the requests of researchers preferentially and urged other research collaborators to agree. |
| 〇 | 3 | In a clinical study to examine the exploratory efficacy of drug A for rare diseases, and dose reactivity of three doses or more, it was proposed to change to a research design that confirms the exploratory efficacy by limiting it to one or two doses that are most likely to be effective based on the interview and examination of the accumulation of cases, the test period, and budget. |
|  | 4 | We only asked the CRC opinion to ensure that there were no problems with the evaluation items and evaluation schedules. |
| 18 | 【PM】Select the appropriate quality control system and policy for clinical research. |  | 1 | To ensure the quality of clinical research, it is desirable to respond in accordance with the SOAP cycle. |
|  | 2 | Propose a plan previously used in another clinical research. |
|  | 3 | To improve the quality of clinical research, ensure sufficient budget, effort, and monitoring of all data. |
| 〇 | 4 | It is desirable to formulate policies and goals for ensuring “quality” in the research in advance, and to apply them to execution plans, data management plans, monitoring plans, etc. in consultation with various personnel. |
| 19 | 【PM】Who can be a stakeholder in the clinical trial? |  | 1 | Co-investigator |
|  | 2 | Monitor |
|  | 3 | Research subjects |
| 〇 | 4 | All of the above |
| 20 | 【PM】Select the appropriate content stipulated in the Communication Management Plan. |  | 1 | The tasks carried out to fulfil the project deliverables and the time and personnel required to do so |
|  | 2 | Strength and influence of the project stakeholders’ interest in the project |
|  | 3 | Requirements and expectations of stakeholders for the project |
| 〇 | 4 | What information to share, and when and how |
| 21 | 【PM】Select the incorrect answer for the purpose of formulating a standard WBS. | 〇 | 1 | A standard WBS allows you to create appropriate research questions from clinical questions. |
|  | 2 | With a standard WBS, you don't have to create a WBS from the start and can save time. |
|  | 3 | Standardizes the work to be tracked by standardizing the content of work required in the project and items according to the process |
|  | 4 | Allows to prevent overlooking of the tasks than creating WBS from the beginning for each project. |
| 22 | 【CRC】Select the incorrect answer of the role of CRC in clinical research planning. |  | 1 | Collaborate as a supporter in the planning of research projects that ensure ethics and scientific rigor |
|  | 2 | Understand research questions to deepen understanding of research outcomes |
| 〇 | 3 | Consider the risk for research subjects to be equivalent to the social significance of the research |
|  | 4 | Mutual understanding with the research support team so that they can handle actual clinical situations |
| 23 | 【CRC】Select appropriate answer for the CRC's “Adjusted Competencies.” |  | 1 | Proposal of risk factors in the research process and consideration of burdens and risks of research subjects |
|  | 2 | Proposal of the SAE sharing system and understanding of data collection process |
|  | 3 | Emphasizing the importance of preparation and storage of records, identifying related departments, and examining whether or not to request research cooperation |
| 〇 | 4 | All of the above |
| 24 | 【CRC】Select appropriate “risk-based proposal” from the CRC's perspective. |  | 1 | The risk proposal can be made from the viewpoint of effects of the case accumulation. |
|  | 2 | Examine the validity from a statistical point of view based on the paper related to the target disease. |
| 〇 | 3 | Risk proposals can be made based on simulations assuming planning in clinical practice. |
|  | 4 | Record in accordance with ALCOA so that the obtained research data is not rejected. |
| 25 | 【CRC】Select the appropriate option for “Examination of burden and risk of the research subjects.” |  | 1 | Proposal of procedures for obtaining consent and measures to ensure privacy |
|  | 2 | Characteristics of the target population and the appropriateness of the protection measures of the research subjects |
|  | 3 | Whether or not there are expenses related to research for the research subject by participation |
| 〇 | 4 | All of the above |
| 26 | 【CRC】Select the appropriate option for “Proposal for A SAE Sharing System.” |  | 1 | Stakeholders can recognize the definition of SAE |
|  | 2 | Flowchart proposal can be presented at the time of SAE occurrence. |
|  | 3 | A means for promptly sharing safety information must be considered and proposed |
| 〇 | 4 | All of the above |
| 27 | 【CRC】Select the incorrect answer for “Proposal of the necessity of creating and storing records from data collection.” |  | 1 | Understand the case report preparation guide |
|  | 2 | Understand the identification and handling of the original material |
| 〇 | 3 | Advise that the research data described in memos, etc. can be used as original materials if they are posted to the medical record later. |
|  | 4 | Consider a mechanism that can record case data and store it as original material under concurrency (ALCOA) |
| 28 | 【CRC】Select the appropriate proposal for requesting research cooperation to relevant departments, etc. |  | 1 | Propose the necessity of identification of medical devices, etc. affecting research evaluation and accuracy control |
|  | 2 | Present business procedures for research and request cooperation to related departments and related parties |
|  | 3 | Grasp the presence or absence of differences from the viewpoint of procedure and general clinical practice |
| 〇 | 4 | All of the above |
| 29 | 【Monitor】Select the monitoring corresponds to clinical research quality control (Plan-Do-Check-Action) |  | 1 | Plan and Do |
|  | 2 | Action and Plan |
| 〇 | 3 | Check and Action |
|  | 4 | Do and Check |
| 30 | 【Monitor】Select the item to consider when creating a monitoring plan. |  | 1 | What kind of error to expect |
|  | 2 | Probability of error |
|  | 3 | Impact of an error |
| 〇 | 4 | All of the above |
| 31 | 【Monitor】Select the correct scientific point of view of the monitoring person in protocol review. |  | 1 | What information is essential for solving research questions and converting them into papers? |
|  | 2 | Can required information be properly identified as a data item? |
|  | 3 | Can data be collected appropriately? |
| 〇 | 4 | All of the above |
| 32 | 【Monitor】Select the correct ethical perspective of the monitoring person in protocol review. |  | 1 | Is the risk minimized? |
|  | 2 | Are benefits maximized? |
|  | 3 | Are various regulations met? |
| 〇 | 4 | All of the above |
| 33 | 【Monitor】Select the correct viewpoint of feasibility of the monitoring person in the protocol review. |  | 1 | Is an appropriate execution and operation system in place? |
|  | 2 | Can I make progress on schedule? |
|  | 3 | Is securing the resources necessary for the expected monitoring execution possible? |
| 〇 | 4 | All of the above |
| 34 | 【DM】Select the correct method of execution of data management. |  | 1 | When data management is performed, all data sources in clinical trials should be identified |
|  | 2 | Computer systems, software, and processes used to collect, process, or store data need to maintain traceability of research data |
|  | 3 | When conducting data management, procedures for the collection, handling and quality control of critical data, including the use of computer systems, must be clarified. |
| 〇 | 4 | All the above |
| 35 | 【DM】If the message of the research results changes or data that greatly compromises the human rights, welfare, and safety of the research subjects is used as critical data, which of the following evaluation items will be considered critical? Select the correct answer. |  | 1 | Key evaluation Items |
|  | 2 | Secondary evaluation items |
|  | 3 | Safety information evaluation items |
| 〇 | 4 | All the above |
| 36 | 【DM】Select the correct answer for project management in data management. |  | 1 | Articulates, defines, and documents trial-specific data management processes. If there is a deliberate deviation from the organization’s SOP, it is necessary to leave a trail of the deviation and basis, leading to the revision of the SOP itself. |
|  | 2 | Documents that a clear, comprehensive, and technically viable schedule that is associated with each schedule and task of the research participants needs to be made. |
|  | 3 | Data management plan such as the original cost timeline and actual expenditures and deliverables must be constantly managed and recorded |
| 〇 | 4 | All the above |
| 37 | 【DM】Select the correct data management education and training and vendor management. |  | 1 | Appropriate training must be conducted and records shall be documented for all members involved in the data management process. |
|  | 2 | Discuss early detection methods and countermeasures for each risk to identify potential risks in the research data generation process. |
|  | 3 | In collaboration with the IT personnel, external vendors, and others, appropriate and compliant electronic and physical resources should be available to ensure to store final products such as research data and processes. |
| 〇 | 4 | All the above |
| 38 | 【Statistics】Select the appropriate role of the statisticians prior to the research. |  | 1 | The design of the research is planned by researchers, and it is inappropriate for the statisticians to voice their opinion. |
|  | 2 | Since statisticians are experts, the sample size and analysis plans should be strongly recommended even if feasibility is somewhat sacrificed. |
|  | 3 | In order to increase the degree of freedom of analysis, it is recommended that the research plan of observational research do not describe details, but to write vaguely that “appropriate methods will be used.” |
| 〇 | 4 | None of the above |
| 39 | 【Statistics】Select the desired choice for reviewing a case report. |  | 1 | It is better to collect a lot of data even if it is not used for analysis if EDC is used to capture data, since there is no limit of variables unlike in paper-based data management. |
| 〇 | 2 | Since it is a part of the analysis plan, it is desirable that the statisticians also participate in the construction of the case report and EDC and express their opinion. |
|  | 3 | If you become too aggressive, the relationship during the research period will deteriorate, so refrain from speaking out. |
|  | 4 | None of the above |
| 40 | 【Statistics】Select the desired role of the statistician in the research system. |  | 1 | To ensure the independence of data, statisticians should not know the status of data entry or the progress of research, even if they do not look at data. |
|  | 2 | In order to enhance the expertise of biostatisticians, they should not be involved in other support staff duties until statistical analysis work and/or data are fixed. |
|  | 3 | When reporting analysis results to researchers, it is important to accurately convey them using only technical terms so as not to exchange the subjectivity of the statisticians. |
| 〇 | 4 | None of the above |
| 41 | 【Statistics】Select the inappropriate answer about validity of the research design. |  | 1 | Fully confirm that the analysis plan is in line with the research objectives of the researcher and not only the statistician. |
| 〇 | 2 | Avoid communication with researchers to avoid bias consulting previous report or the opinions of researchers. |
|  | 3 | When reviewing the research plan, it is necessary to confirm not only the analysis method corresponding to each evaluation item but also the information necessary for those analyses, and the collection items and the research schedule. |
|  | 4 | None of the above |
| 42 | 【Statistics】 Select the desirable choice for evaluation of EDC. | 〇 | 1 | If possible, it is desirable to participate in the review from the time of screen construction and grasp how data can be obtained. |
|  | 2 | Experienced DMs can foresee results just by looking at EDC, so it is better not to see the EDC screen even before the start of the research until the data fix. |
|  | 3 | Case reports and EDCs should have a lot of free description columns provided in order to expand the range of analysis since there may be data that cannot be assumed at the time of research planning. |
|  | 4 | None of the above |
| 43 | 【Ethics】 Select the appropriate role of the research ethics coordinator. |  | 1 | Advising on research planning from the viewpoint of subject protection |
|  | 2 | Advising on problem-solving behavior based on ethical principles |
|  | 3 | Being able to consult independently in the event of an ethical problem |
| 〇 | 4 | All of above |
| 44 | 【Ethics】Select the incorrect answer about clinical research and medical practice. |  | 1 | The responsibility of a physician in the consultation is “patient's treatment” |
|  | 2 | The purpose of the patient and the physician are consistent in the consultation |
| 〇 | 3 | The purpose of clinical research is to benefit the patient |
|  | 4 | Findings from clinical research will be useful for future medical care and diagnosis |
| 45 | 【Ethics】Select the incorrect description of the Code of Ethics in Clinical Research. |  | 1 | Based on the “Declaration of Helsinki” |
|  | 2 | Born out of reflection on past inhumane human experiments |
|  | 3 | Shows the direction for the creation of scientific evidence while striving to protect the research subjects. |
| 〇 | 4 | It is acceptable that burdens and risks arise to a small number of individuals if the interests of society are large. |
| 46 | 【Ethics】Select the correct description of the three principles of research ethics. |  | 1 | Informed consent embodies the principle of respect for independency. |
|  | 2 | Risk benefit assessment embodies the principle of beneficence. |
|  | 3 | The fair choice of the subjects embodies the principles of justice. |
| 〇 | 4 | All of the above |
| 47 | 【Ethics】 Select the incorrect answer for informed consent. | 〇 | 1 | Informed consent must be completed at once |
|  | 2 | Provide sufficient information to the research subjects |
|  | 3 | Ensure that the research subject fully understand the contents of information |
|  | 4 | Ensure voluntary consent of the research subjects |
| 48 | 【Ethics】Select the incorrect response regarding ethical research implementation. |  | 1 | Clarify the distinction between research and medical practice |
|  | 2 | Appropriate protection of subjects and response to the socially vulnerable |
| 〇 | 3 | When ethical problems arise, make decisions based on your own values |
|  | 4 | Suggest changes or discontinuations when ethically unacceptable problems are discovered |
