# Supplementary material for: Clinical Research Knowledge of Medical Graduates in Japan: A Pilot Study
Source: Research Square preprint supplement (doi:10.21203/rs.3.rs-7699884/v1), 2025-12-01
Supplement: Supplementary file 3 [file b688debc286d64b54579c18a.docx]

**Table S2.** Correct answer rates by demographic variables for clinical research knowledge questions

|  |  | Q1 | Q2 | Q3 | Q4 | Q5 | Total Score |
| --- | --- | --- | --- | --- | --- | --- | --- |
|  |  | N(%) | N(%) | N(%) | N(%) | N(%) | Mean(SD) |
| Total |  | 158(37.7) | 328(77.9) | 273(65.5) | 223(53.7) | 300(73.2) | 3.11(1.16) |
| Gender | Man | 104(38.1) | 212(77.1) | 189(69.5) | 137(50.6) | 191(71) | 3.1(1.14) |
| Woman | 52(37.1) | 111(79.3) | 79(56.8) | 82(59.4) | 105(77.8) | 3.11(1.21) |
| Undisclosed | 2(33.3) | 5(83.3) | 5(83.3) | 4(66.7) | 4(66.7) | 3.33(1.37) |
| Age | 24 years | 55(33.5) | 134(81.2) | 105(64.4) | 96(58.9) | 115(71.9) | 3.11(1.25) |
| 25 years | 43(36.1) | 91(77.8) | 79(68.1) | 63(54.3) | 86(74.1) | 3.14(1.15) |
| ≥26 years | 60(44.4) | 102(73.9) | 88(64.2) | 63(46.7) | 98(73.7) | 3.07(1.08) |
| Location | Rural | 94(36.2) | 205(78.2) | 173(66.5) | 138(53.1) | 193(76) | 3.12(1.12) |
| Urban | 64(40.3) | 123(77.4) | 100(63.7) | 85(54.8) | 107(68.6) | 3.08(1.23) |
| University Type | Public University | 108(38.8) | 223(79.6) | 182(65.9) | 155(56.2) | 199(73.2) | 3.16(1.18) |
| Private University | 46(34.6) | 98(73.7) | 87(65.4) | 61(46.6) | 94(72.3) | 2.96(1.11) |
| Overseas University | 2(50) | 3(75) | 1(25) | 4(100) | 3(75) | 3.25(0.5) |
| Hospital Type | Designated | 45(48.9) | 69(74.2) | 58(63) | 52(57.1) | 65(71.4) | 3.17(1.23) |
| Not designated | 112(34.4) | 258(78.9) | 214(66) | 170(52.6) | 234(73.6) | 3.08(1.14) |

Note: The table shows the correct answer rates (N, %) for questions Q1–Q5 across gender, age, hospital location, and type of graduating university. Additionally, it presents the mean and standard deviation (M ± SD) of the total score (out of 5), calculated as the sum of correct answers for Q1–Q5. “Hospital Type” denotes whether the graduated university’s hospital is designated as a clinical research core hospital.
