# Supplementary material for: Clinical Research Knowledge of Medical Graduates in Japan: A Pilot Study
Source: Research Square preprint supplement (doi:10.21203/rs.3.rs-7699884/v1), 2025-12-01
Supplement: Supplementary file 4 [file d93837c6e4e508bb78541229.xlsx]

## Sheet: Anonimous
Consent★	Gender	Gender_undisclosed	Age	Age_Older	Age_three	Private_Public_University	ClinicalResearchCoreHospital	PI_Q1	PI_Q2	PI_Q3	PI_Q4	PI_Q5	Q1_correct	Q2_correct	Q3_correct	Q4_correct	Q5_correct	UrbanRural	Hospital_Type	Hospital_type_binary	PI_score
2	2	2	2	2	2	#NULL!	#NULL!	2	2	2	3	4	1	1	1	1	1	1	1	1	5
2	2	2	1	1	1	#NULL!	#NULL!	5	5	5	5	5	#NULL!	#NULL!	#NULL!	#NULL!	#NULL!	2	2	2	#NULL!
2	2	2	1	1	1	1	0	3	2	2	2	4	0	1	1	0	1	1	1	1	3
2	2	2	1	1	1	1	0	5	5	5	5	5	#NULL!	#NULL!	#NULL!	#NULL!	#NULL!	1	1	1	#NULL!
2	2	2	2	2	2	1	0	5	5	5	5	5	#NULL!	#NULL!	#NULL!	#NULL!	#NULL!	1	1	1	#NULL!
2	2	2	1	1	1	1	0	3	1	4	4	4	0	0	0	0	1	2	1	1	1
2	3	3	2	2	2	1	0	3	2	2	2	3	0	1	1	0	0	2	1	1	2
2	3	3	1	1	1	1	0	2	2	5	3	4	1	1	#NULL!	1	1	1	1	1	#NULL!
2	3	3	2	2	2	1	0	2	1	2	2	4	1	0	1	0	1	1	1	1	3
2	3	3	2	2	2	1	0	5	5	5	5	5	#NULL!	#NULL!	#NULL!	#NULL!	#NULL!	1	1	1	#NULL!
2	3	3	1	1	1	1	0	1	2	2	2	2	0	1	1	0	0	2	1	1	2
2	2	2	1	1	1	1	0	4	2	2	3	4	0	1	1	1	1	2	1	1	4
2	2	2	2	2	2	1	0	3	2	2	3	1	0	1	1	1	0	1	1	1	3
2	2	2	1	1	1	1	0	4	2	3	2	4	0	1	0	0	1	1	1	1	2
2	3	3	1	1	1	1	0	3	2	5	1	3	0	1	#NULL!	0	0	2	1	1	#NULL!
2	3	3	1	1	1	1	0	2	2	2	3	4	1	1	1	1	1	2	1	1	5
2	2	2	2	2	2	2	0	1	2	2	2	4	0	1	1	0	1	2	1	1	3
2	2	2	3	3	3	2	0	4	2	2	1	4	0	1	1	0	1	1	1	1	3
2	3	3	3	3	3	2	0	2	2	2	3	1	1	1	1	1	0	2	1	1	4
2	3	3	2	2	2	2	0	1	2	2	2	4	0	1	1	0	1	1	1	1	3
2	3	3	4	4	3	2	0	2	2	2	2	4	1	1	1	0	1	1	1	1	4
2	3	3	8	8	3	2	0	2	4	2	3	4	1	0	1	1	1	1	2	2	4
2	3	3	2	2	2	2	0	3	4	3	2	2	0	0	0	0	0	1	1	1	0
2	2	2	15	8	3	2	0	5	5	5	5	5	#NULL!	#NULL!	#NULL!	#NULL!	#NULL!	2	1	1	#NULL!
2	2	2	6	6	3	2	0	2	2	2	3	4	1	1	1	1	1	2	1	1	5
2	3	3	7	7	3	2	0	3	4	3	3	4	0	0	0	1	1	1	1	1	2
2	3	3	7	7	3	2	0	5	5	5	5	5	#NULL!	#NULL!	#NULL!	#NULL!	#NULL!	1	1	1	#NULL!
2	3	3	1	1	1	2	0	3	2	2	1	4	0	1	1	0	1	1	1	1	3
2	3	3	1	1	1	2	0	2	2	2	4	4	1	1	1	0	1	1	1	1	4
2	2	2	1	1	1	1	0	3	2	2	3	4	0	1	1	1	1	1	1	1	4
2	2	2	2	2	2	1	0	5	5	5	5	5	#NULL!	#NULL!	#NULL!	#NULL!	#NULL!	2	1	1	#NULL!
2	3	3	3	3	3	1	0	4	2	2	1	1	0	1	1	0	0	2	1	1	2
2	3	3	2	2	2	1	0	2	4	2	3	4	1	0	1	1	1	1	1	1	4
2	3	3	3	3	3	1	0	2	2	4	2	1	1	1	0	0	0	1	2	2	2
2	1	1	1	1	1	1	0	2	2	2	3	4	1	1	1	1	1	2	1	1	5
2	2	2	1	1	1	1	0	1	2	1	3	1	0	1	0	1	0	2	1	1	2
2	3	3	3	3	3	1	0	4	2	2	5	4	0	1	1	#NULL!	1	2	1	1	#NULL!
2	3	3	3	3	3	1	0	2	4	4	1	4	1	0	0	0	1	1	1	1	2
2	2	2	3	3	3	1	0	3	4	2	3	4	0	0	1	1	1	1	1	1	3
2	2	2	1	1	1	1	0	1	2	2	1	1	0	1	1	0	0	1	1	1	2
2	2	2	2	2	2	1	0	2	2	3	3	4	1	1	0	1	1	1	1	1	4
2	2	2	3	3	3	1	0	4	1	2	3	5	0	0	1	1	#NULL!	1	1	1	#NULL!
2	2	2	1	1	1	1	0	3	2	1	1	2	0	1	0	0	0	1	1	1	1
2	2	2	3	3	3	1	0	4	2	3	1	4	0	1	0	0	1	1	1	1	2
2	3	3	1	1	1	1	0	4	2	2	3	3	0	1	1	1	0	1	1	1	3
2	3	3	2	2	2	1	0	3	2	2	3	4	0	1	1	1	1	1	1	1	4
2	3	3	2	2	2	1	0	4	2	2	3	4	0	1	1	1	1	1	1	1	4
2	3	3	1	1	1	1	0	3	2	2	2	4	0	1	1	0	1	1	1	1	3
2	3	3	6	6	3	1	0	4	2	2	3	1	0	1	1	1	0	1	1	1	3
2	3	3	1	1	1	1	0	3	2	2	3	4	0	1	1	1	1	1	1	1	4
2	3	3	1	1	1	1	0	3	2	2	3	1	0	1	1	1	0	1	1	1	3
2	3	3	2	2	2	1	0	3	2	2	1	4	0	1	1	0	1	1	1	1	3
2	3	3	4	4	3	1	0	3	1	2	2	4	0	0	1	0	1	1	1	1	2
2	3	3	3	3	3	1	0	3	2	2	2	4	0	1	1	0	1	1	1	1	3
2	3	3	1	1	1	1	0	3	2	2	3	2	0	1	1	1	0	1	1	1	3
2	3	3	2	2	2	1	0	4	2	2	2	4	0	1	1	0	1	1	1	1	3
2	3	3	1	1	1	1	0	4	2	3	3	4	0	1	0	1	1	1	1	1	3
2	3	3	3	3	3	1	0	1	1	3	1	2	0	0	0	0	0	1	1	1	0
2	3	3	1	1	1	1	0	4	2	3	3	4	0	1	0	1	1	1	1	1	3
2	2	2	1	1	1	2	0	5	5	5	5	5	#NULL!	#NULL!	#NULL!	#NULL!	#NULL!	1	1	1	#NULL!
2	2	2	2	2	2	2	0	4	2	2	1	4	0	1	1	0	1	1	1	1	3
2	2	2	2	2	2	2	0	3	4	1	3	4	0	0	0	1	1	2	1	1	2
2	3	3	1	1	1	2	0	2	2	3	2	1	1	1	0	0	0	2	1	1	2
2	3	3	1	1	1	2	0	4	1	2	2	4	0	0	1	0	1	1	1	1	2
2	3	3	2	2	2	2	0	3	2	2	1	4	0	1	1	0	1	1	2	2	3
2	1	1	2	2	2	2	0	2	2	2	3	4	1	1	1	1	1	1	2	2	5
2	2	2	3	3	3	2	0	4	2	2	3	3	0	1	1	1	0	1	2	2	3
2	2	2	3	3	3	2	0	2	2	2	2	4	1	1	1	0	1	1	2	2	4
2	2	2	2	2	2	2	0	4	2	3	2	4	0	1	0	0	1	1	2	2	2
2	2	2	2	2	2	2	0	1	5	5	5	5	0	#NULL!	#NULL!	#NULL!	#NULL!	1	2	2	#NULL!
2	2	2	2	2	2	2	0	4	1	2	3	4	0	0	1	1	1	1	2	2	3
2	2	2	2	2	2	2	0	3	2	2	2	4	0	1	1	0	1	1	2	2	3
2	2	2	2	2	2	2	0	5	5	5	5	5	#NULL!	#NULL!	#NULL!	#NULL!	#NULL!	1	2	2	#NULL!
2	2	2	4	4	3	2	0	5	2	2	2	4	#NULL!	1	1	0	1	1	2	2	#NULL!
2	2	2	2	2	2	2	0	2	2	3	3	4	1	1	0	1	1	1	2	2	4
2	2	2	2	2	2	2	0	4	4	2	2	4	0	0	1	0	1	1	2	2	2
2	2	2	2	2	2	2	0	2	2	2	3	4	1	1	1	1	1	2	1	1	5
2	3	3	2	2	2	2	0	2	4	2	3	4	1	0	1	1	1	1	1	1	4
2	3	3	1	1	1	2	0	4	2	2	3	4	0	1	1	1	1	1	2	2	4
2	3	3	1	1	1	2	0	3	2	3	3	4	0	1	0	1	1	1	2	2	3
2	3	3	3	3	3	2	0	3	2	3	2	4	0	1	0	0	1	1	2	2	2
2	3	3	2	2	2	2	0	3	2	2	3	4	0	1	1	1	1	1	2	2	4
2	3	3	2	2	2	2	0	2	3	2	2	4	1	0	1	0	1	1	2	2	3
2	3	3	1	1	1	2	0	2	3	2	3	2	1	0	1	1	0	1	2	2	3
2	3	3	2	2	2	2	0	4	2	2	3	4	0	1	1	1	1	1	2	2	4
2	3	3	4	4	3	2	0	3	2	1	1	4	0	1	0	0	1	1	2	2	2
2	3	3	6	6	3	2	0	2	2	2	2	1	1	1	1	0	0	1	2	2	3
2	3	3	4	4	3	2	0	2	2	2	4	4	1	1	1	0	1	1	2	2	4
2	3	3	1	1	1	2	0	3	2	2	2	4	0	1	1	0	1	1	2	2	3
2	3	3	3	3	3	2	0	4	2	1	1	4	0	1	0	0	1	1	2	2	2
2	3	3	3	3	3	2	0	3	2	2	4	4	0	1	1	0	1	1	2	2	3
2	3	3	4	4	3	2	0	3	3	2	1	5	0	0	1	0	#NULL!	1	2	2	#NULL!
2	3	3	2	2	2	2	0	5	5	5	5	5	#NULL!	#NULL!	#NULL!	#NULL!	#NULL!	1	2	2	#NULL!
2	2	2	3	3	3	1	0	3	2	3	3	4	0	1	0	1	1	1	1	1	3
2	2	2	2	2	2	1	0	4	2	2	3	4	0	1	1	1	1	1	1	1	4
2	3	3	7	7	3	1	0	2	4	2	2	4	1	0	1	0	1	2	1	1	3
2	3	3	2	2	2	1	0	3	2	2	1	4	0	1	1	0	1	1	1	1	3
2	3	3	3	3	3	1	0	2	2	2	3	4	1	1	1	1	1	1	1	1	5
2	3	3	2	2	2	1	0	2	1	5	5	5	1	0	#NULL!	#NULL!	#NULL!	1	1	1	#NULL!
2	3	3	2	2	2	1	0	2	3	3	3	2	1	0	0	1	0	1	1	1	2
2	3	3	3	3	3	1	0	2	2	2	3	4	1	1	1	1	1	1	1	1	5
2	3	3	3	3	3	1	0	5	5	5	5	5	#NULL!	#NULL!	#NULL!	#NULL!	#NULL!	1	1	1	#NULL!
2	3	3	2	2	2	1	0	3	2	2	3	4	0	1	1	1	1	1	1	1	4
2	3	3	1	1	1	1	0	2	2	2	3	4	1	1	1	1	1	1	1	1	5
2	1	1	2	2	2	2	0	5	5	5	5	5	#NULL!	#NULL!	#NULL!	#NULL!	#NULL!	2	1	1	#NULL!
2	2	2	3	3	3	2	0	3	2	2	3	1	0	1	1	1	0	2	2	2	3
2	2	2	10	8	3	2	0	4	4	4	3	1	0	0	0	1	0	1	2	2	1
2	3	3	4	4	3	2	0	3	2	2	4	5	0	1	1	0	#NULL!	1	1	1	#NULL!
2	3	3	2	2	2	2	0	3	5	5	5	5	0	#NULL!	#NULL!	#NULL!	#NULL!	2	1	1	#NULL!
2	2	2	1	1	1	1	0	4	2	2	3	5	0	1	1	1	#NULL!	2	1	1	#NULL!
2	3	3	8	8	3	2	0	4	2	2	1	4	0	1	1	0	1	1	1	1	3
2	3	3	5	5	3	2	0	2	2	1	2	1	1	1	0	0	0	1	1	1	2
2	3	3	2	2	2	2	0	4	2	2	2	4	0	1	1	0	1	2	2	2	3
2	3	3	2	2	2	2	0	1	2	2	2	3	0	1	1	0	0	1	1	1	2
2	3	3	3	3	3	2	0	2	1	2	2	4	1	0	1	0	1	2	1	1	3
2	1	1	3	3	3	2	0	3	2	1	3	4	0	1	0	1	1	1	1	1	3
2	2	2	1	1	1	2	0	4	2	2	2	4	0	1	1	0	1	2	2	2	3
2	3	3	2	2	2	2	0	3	2	1	4	3	0	1	0	0	0	1	1	1	1
2	3	3	2	2	2	2	0	3	2	2	1	2	0	1	1	0	0	2	1	1	2
2	3	3	1	1	1	2	0	3	2	2	3	4	0	1	1	1	1	1	1	1	4
2	3	3	2	2	2	2	0	4	2	2	3	2	0	1	1	1	0	1	2	2	3
2	3	3	3	3	3	2	0	3	2	2	3	4	0	1	1	1	1	2	1	1	4
2	2	2	1	1	1	#NULL!	0	4	2	2	3	4	0	1	1	1	1	1	1	1	4
2	3	3	3	3	3	#NULL!	0	1	2	4	2	4	0	1	0	0	1	1	1	1	2
2	3	3	2	2	2	#NULL!	0	2	2	2	3	4	1	1	1	1	1	2	1	1	5
2	2	2	5	5	3	2	0	3	2	4	3	4	0	1	0	1	1	1	1	1	3
2	2	2	1	1	1	2	0	4	2	4	3	4	0	1	0	1	1	2	2	2	3
2	2	2	1	1	1	2	0	2	2	4	2	4	1	1	0	0	1	2	1	1	3
2	2	2	2	2	2	2	0	2	2	4	4	4	1	1	0	0	1	2	1	1	3
2	2	2	6	6	3	2	0	2	2	4	5	5	1	1	0	#NULL!	#NULL!	1	1	1	#NULL!
2	2	2	3	3	3	2	0	2	2	2	3	4	1	1	1	1	1	1	2	2	5
2	2	2	1	1	1	2	0	4	2	4	3	4	0	1	0	1	1	2	1	1	3
2	3	3	1	1	1	2	0	3	2	2	3	4	0	1	1	1	1	1	1	1	4
2	3	3	5	5	3	2	0	2	2	2	3	4	1	1	1	1	1	1	2	2	5
2	3	3	2	2	2	2	0	4	2	3	3	4	0	1	0	1	1	1	1	1	3
2	3	3	2	2	2	2	0	3	2	2	2	4	0	1	1	0	1	1	1	1	3
2	3	3	1	1	1	2	0	4	2	2	3	4	0	1	1	1	1	1	1	1	4
2	3	3	5	5	3	2	0	2	2	2	3	4	1	1	1	1	1	1	2	2	5
2	2	2	3	3	3	2	0	2	4	5	2	4	1	0	#NULL!	0	1	1	1	1	#NULL!
2	2	2	2	2	2	2	0	2	1	1	2	2	1	0	0	0	0	2	1	1	1
2	2	2	2	2	2	2	0	4	4	3	3	4	0	0	0	1	1	1	1	1	2
2	2	2	3	3	3	2	0	4	2	4	2	4	0	1	0	0	1	2	1	1	2
2	2	2	2	2	2	2	0	4	2	2	3	4	0	1	1	1	1	1	1	1	4
2	3	3	1	1	1	2	0	2	4	2	1	4	1	0	1	0	1	1	1	1	3
2	3	3	1	1	1	2	0	5	5	5	5	5	#NULL!	#NULL!	#NULL!	#NULL!	#NULL!	1	3	2	#NULL!
2	3	3	7	7	3	2	0	1	1	3	1	4	0	0	0	0	1	1	2	2	1
2	2	2	1	1	1	1	0	2	2	2	3	4	1	1	1	1	1	2	1	1	5
2	3	3	1	1	1	1	0	4	2	2	3	4	0	1	1	1	1	2	1	1	4
2	3	3	1	1	1	1	0	3	2	2	3	4	0	1	1	1	1	1	1	1	4
2	3	3	2	2	2	1	0	4	2	2	3	4	0	1	1	1	1	1	1	1	4
2	2	2	1	1	1	2	0	3	4	1	4	2	0	0	0	0	0	2	2	2	0
2	2	2	1	1	1	2	0	5	5	5	5	5	#NULL!	#NULL!	#NULL!	#NULL!	#NULL!	1	1	1	#NULL!
2	2	2	1	1	1	2	0	1	2	4	3	1	0	1	0	1	0	2	2	2	2
2	2	2	3	3	3	2	0	2	4	2	3	4	1	0	1	1	1	2	2	2	4
2	3	3	3	3	3	2	0	2	4	2	2	1	1	0	1	0	0	1	1	1	2
2	3	3	3	3	3	2	0	5	5	5	5	5	#NULL!	#NULL!	#NULL!	#NULL!	#NULL!	1	1	1	#NULL!
2	3	3	5	5	3	2	0	1	2	2	2	4	0	1	1	0	1	1	1	1	3
2	3	3	3	3	3	2	0	1	2	2	5	1	0	1	1	#NULL!	0	2	2	2	#NULL!
2	3	3	2	2	2	2	0	4	2	2	3	1	0	1	1	1	0	1	1	1	3
2	3	3	2	2	2	2	0	4	2	2	2	1	0	1	1	0	0	2	1	1	2
2	2	2	3	3	3	1	0	3	2	2	3	4	0	1	1	1	1	2	1	1	4
2	3	3	1	1	1	1	0	4	2	3	3	4	0	1	0	1	1	1	1	1	3
2	3	3	1	1	1	1	0	4	2	2	3	4	0	1	1	1	1	2	1	1	4
2	3	3	1	1	1	1	0	3	2	2	3	1	0	1	1	1	0	2	1	1	3
2	3	3	2	2	2	1	0	3	4	4	2	3	0	0	0	0	0	2	1	1	0
2	3	3	1	1	1	1	0	1	2	3	3	4	0	1	0	1	1	1	1	1	3
2	3	3	1	1	1	1	0	4	2	2	3	4	0	1	1	1	1	2	1	1	4
2	2	2	3	3	3	1	0	3	2	2	3	4	0	1	1	1	1	2	1	1	4
2	2	2	1	1	1	1	0	3	4	3	3	4	0	0	0	1	1	1	1	1	2
2	2	2	2	2	2	1	0	2	2	2	3	4	1	1	1	1	1	1	1	1	5
2	3	3	10	8	3	1	0	3	2	2	2	2	0	1	1	0	0	2	1	1	2
2	3	3	1	1	1	1	0	3	2	2	1	1	0	1	1	0	0	2	2	2	2
2	2	2	2	2	2	2	0	4	2	3	3	4	0	1	0	1	1	2	2	2	3
2	2	2	3	3	3	2	0	3	2	2	3	2	0	1	1	1	0	1	1	1	3
2	3	3	3	3	3	2	0	2	2	4	3	1	1	1	0	1	0	1	2	2	3
2	2	2	2	2	2	1	0	2	2	4	3	4	1	1	0	1	1	1	1	1	4
2	3	3	2	2	2	1	0	5	5	5	5	5	#NULL!	#NULL!	#NULL!	#NULL!	#NULL!	2	1	1	#NULL!
2	3	3	1	1	1	1	0	4	4	2	2	4	0	0	1	0	1	1	1	1	2
2	3	3	8	8	3	1	0	5	1	1	1	1	#NULL!	0	0	0	0	1	1	1	#NULL!
2	2	2	2	2	2	1	0	4	2	3	4	4	0	1	0	0	1	1	1	1	2
2	3	3	2	2	2	1	0	2	2	3	2	2	1	1	0	0	0	1	1	1	2
2	3	3	2	2	2	1	0	5	5	5	5	5	#NULL!	#NULL!	#NULL!	#NULL!	#NULL!	2	1	1	#NULL!
2	3	3	2	2	2	1	0	4	4	2	2	4	0	0	1	0	1	2	1	1	2
2	3	3	1	1	1	1	0	3	2	2	2	4	0	1	1	0	1	2	1	1	3
2	3	3	2	2	2	1	0	3	2	2	2	2	0	1	1	0	0	2	1	1	2
2	2	2	2	2	2	1	0	3	2	1	3	4	0	1	0	1	1	1	1	1	3
2	2	2	1	1	1	1	0	5	5	5	5	5	#NULL!	#NULL!	#NULL!	#NULL!	#NULL!	2	1	1	#NULL!
2	3	3	2	2	2	1	0	2	2	2	4	4	1	1	1	0	1	2	1	1	4
2	3	3	1	1	1	1	0	3	2	2	2	2	0	1	1	0	0	1	1	1	2
2	2	2	1	1	1	1	0	2	2	2	1	4	1	1	1	0	1	2	1	1	4
2	3	3	2	2	2	1	0	3	2	2	2	4	0	1	1	0	1	1	1	1	3
2	3	3	2	2	2	1	0	5	5	5	5	5	#NULL!	#NULL!	#NULL!	#NULL!	#NULL!	1	1	1	#NULL!
2	3	3	2	2	2	1	0	4	2	2	3	1	0	1	1	1	0	2	1	1	3
2	2	2	5	5	3	2	0	1	2	2	1	4	0	1	1	0	1	1	1	1	3
2	2	2	1	1	1	2	0	1	2	1	3	3	0	1	0	1	0	1	1	1	2
2	2	2	4	4	3	2	0	4	2	2	4	4	0	1	1	0	1	1	1	1	3
2	3	3	3	3	3	2	0	2	2	2	3	4	1	1	1	1	1	2	1	1	5
2	2	2	1	1	1	1	0	3	2	1	2	1	0	1	0	0	0	1	1	1	1
2	2	2	1	1	1	1	0	1	2	4	4	4	0	1	0	0	1	1	1	1	2
2	2	2	2	2	2	1	0	2	2	2	1	4	1	1	1	0	1	1	2	2	4
2	2	2	1	1	1	1	0	4	3	1	2	2	0	0	0	0	0	1	2	2	0
2	2	2	3	3	3	1	0	5	5	5	5	5	#NULL!	#NULL!	#NULL!	#NULL!	#NULL!	2	1	1	#NULL!
2	3	3	1	1	1	1	0	5	5	5	5	5	#NULL!	#NULL!	#NULL!	#NULL!	#NULL!	1	1	1	#NULL!
2	3	3	1	1	1	1	0	4	2	2	3	4	0	1	1	1	1	1	1	1	4
2	3	3	7	7	3	1	0	2	2	3	1	4	1	1	0	0	1	1	1	1	3
2	3	3	1	1	1	1	0	4	2	2	3	4	0	1	1	1	1	1	1	1	4
2	3	3	2	2	2	1	0	2	2	2	4	4	1	1	1	0	1	1	1	1	4
2	3	3	1	1	1	1	0	4	2	2	2	4	0	1	1	0	1	2	1	1	3
2	3	3	1	1	1	1	0	2	2	2	2	1	1	1	1	0	0	1	2	2	3
2	3	3	1	1	1	1	0	2	2	1	3	3	1	1	0	1	0	1	2	2	3
2	3	3	1	1	1	1	0	4	4	2	2	4	0	0	1	0	1	1	2	2	2
2	3	3	3	3	3	1	0	4	2	2	3	4	0	1	1	1	1	1	2	2	4
2	3	3	6	6	3	1	0	5	5	5	5	5	#NULL!	#NULL!	#NULL!	#NULL!	#NULL!	1	2	2	#NULL!
2	3	3	1	1	1	1	0	2	2	4	3	1	1	1	0	1	0	1	2	2	3
2	3	3	2	2	2	1	0	4	2	4	2	4	0	1	0	0	1	2	1	1	2
2	3	3	3	3	3	1	0	2	1	4	3	3	1	0	0	1	0	2	1	1	2
2	2	2	3	3	3	1	0	4	2	2	2	4	0	1	1	0	1	1	1	1	3
2	2	2	10	8	3	1	0	4	2	3	4	2	0	1	0	0	0	1	1	1	1
2	2	2	1	1	1	1	0	4	2	2	3	4	0	1	1	1	1	1	1	1	4
2	3	3	14	8	3	1	0	2	2	2	3	1	1	1	1	1	0	1	1	1	4
2	3	3	1	1	1	1	0	3	2	2	3	4	0	1	1	1	1	2	1	1	4
2	3	3	3	3	3	1	0	4	2	2	3	4	0	1	1	1	1	2	1	1	4
2	3	3	12	8	3	1	0	2	2	2	4	4	1	1	1	0	1	1	1	1	4
2	3	3	3	3	3	1	0	4	2	2	3	4	0	1	1	1	1	1	1	1	4
2	3	3	7	7	3	1	0	4	2	1	3	4	0	1	0	1	1	1	1	1	3
2	3	3	1	1	1	1	0	1	2	2	3	4	0	1	1	1	1	1	1	1	4
2	2	2	1	1	1	1	0	3	3	3	3	3	0	0	0	1	0	2	1	1	1
2	2	2	1	1	1	1	0	2	2	1	3	4	1	1	0	1	1	2	1	1	4
2	3	3	5	5	3	1	0	4	2	2	1	4	0	1	1	0	1	1	1	1	3
2	3	3	1	1	1	1	0	2	2	2	3	4	1	1	1	1	1	2	1	1	5
2	3	3	1	1	1	1	0	2	2	1	3	4	1	1	0	1	1	2	1	1	4
2	3	3	1	1	1	1	0	4	2	3	2	5	0	1	0	0	#NULL!	2	1	1	#NULL!
2	3	3	1	1	1	1	0	3	2	2	1	4	0	1	1	0	1	2	1	1	3
2	3	3	4	4	3	2	0	1	4	3	1	1	0	0	0	0	0	2	1	1	0
2	3	3	5	5	3	2	0	2	2	2	3	1	1	1	1	1	0	1	1	1	4
2	3	3	4	4	3	2	0	2	1	2	2	4	1	0	1	0	1	2	1	1	3
2	3	3	9	8	3	2	0	3	1	2	4	4	0	0	1	0	1	1	1	1	2
2	3	3	12	8	3	2	0	2	1	2	1	4	1	0	1	0	1	1	1	1	3
2	2	2	2	2	2	2	0	3	2	3	4	4	0	1	0	0	1	2	1	1	2
2	2	2	1	1	1	2	0	2	2	2	3	4	1	1	1	1	1	1	1	1	5
2	2	2	3	3	3	2	0	2	2	2	2	4	1	1	1	0	1	1	1	1	4
2	2	2	3	3	3	2	0	3	2	4	2	1	0	1	0	0	0	1	1	1	1
2	3	3	1	1	1	2	0	3	2	2	3	1	0	1	1	1	0	2	1	1	3
2	3	3	2	2	2	2	0	1	4	1	3	4	0	0	0	1	1	1	1	1	2
2	1	1	3	3	3	1	0	3	2	2	2	4	0	1	1	0	1	1	1	1	3
2	2	2	3	3	3	1	0	2	4	2	2	4	1	0	1	0	1	1	1	1	3
2	2	2	1	1	1	1	0	1	2	1	2	4	0	1	0	0	1	1	1	1	2
2	2	2	3	3	3	1	0	4	2	2	3	4	0	1	1	1	1	1	1	1	4
2	2	2	2	2	2	1	0	4	2	2	3	4	0	1	1	1	1	1	1	1	4
2	2	2	1	1	1	1	0	2	2	2	3	4	1	1	1	1	1	2	1	1	5
2	3	3	1	1	1	1	0	1	1	3	3	3	0	0	0	1	0	2	2	2	1
2	3	3	1	1	1	1	0	2	2	2	3	4	1	1	1	1	1	2	1	1	5
2	3	3	2	2	2	1	0	2	2	2	2	4	1	1	1	0	1	1	1	1	4
2	3	3	18	#NULL!	#NULL!	1	0	3	2	2	3	4	0	1	1	1	1	1	1	1	4
2	3	3	1	1	1	1	0	3	2	2	2	4	0	1	1	0	1	1	1	1	3
2	3	3	3	3	3	1	0	2	2	2	3	4	1	1	1	1	1	1	1	1	5
2	3	3	3	3	3	1	0	3	3	2	2	2	0	0	1	0	0	1	1	1	1
2	3	3	4	4	3	1	0	1	2	4	1	4	0	1	0	0	1	1	1	1	2
2	3	3	3	3	3	1	0	4	2	2	2	4	0	1	1	0	1	1	1	1	3
2	3	3	9	8	3	1	0	2	2	1	3	4	1	1	0	1	1	2	1	1	4
2	2	2	1	1	1	1	0	3	2	2	2	4	0	1	1	0	1	2	1	1	3
2	2	2	3	3	3	1	0	2	2	2	2	4	1	1	1	0	1	1	1	1	4
2	3	3	1	1	1	1	0	5	5	5	5	5	#NULL!	#NULL!	#NULL!	#NULL!	#NULL!	2	1	1	#NULL!
2	3	3	1	1	1	1	0	2	2	2	2	4	1	1	1	0	1	2	1	1	4
2	2	2	1	1	1	1	0	2	2	1	5	5	1	1	0	#NULL!	#NULL!	1	1	1	#NULL!
2	2	2	1	1	1	1	0	4	2	2	3	4	0	1	1	1	1	1	1	1	4
2	2	2	1	1	1	1	0	4	4	3	2	1	0	0	0	0	0	1	1	1	0
2	3	3	3	3	3	1	0	2	2	2	1	4	1	1	1	0	1	1	1	1	4
2	3	3	2	2	2	1	0	3	2	2	3	4	0	1	1	1	1	1	1	1	4
2	3	3	5	5	3	1	0	2	4	4	3	4	1	0	0	1	1	1	1	1	3
2	3	3	1	1	1	1	0	2	2	4	4	2	1	1	0	0	0	1	1	1	2
2	3	3	1	1	1	1	0	2	2	2	2	4	1	1	1	0	1	1	1	1	4
2	3	3	1	1	1	1	0	1	1	1	1	1	0	0	0	0	0	1	1	1	0
2	2	2	7	7	3	1	0	2	2	1	3	4	1	1	0	1	1	1	1	1	4
2	2	2	1	1	1	1	0	4	2	4	4	4	0	1	0	0	1	1	1	1	2
2	2	2	4	4	3	2	0	4	2	2	2	4	0	1	1	0	1	2	2	2	3
2	2	2	4	4	3	2	0	2	2	2	2	1	1	1	1	0	0	1	1	1	3
2	2	2	3	3	3	2	0	4	3	2	2	4	0	0	1	0	1	1	2	2	2
2	3	3	4	4	3	2	0	3	2	2	2	4	0	1	1	0	1	1	2	2	3
2	3	3	1	1	1	2	0	4	2	2	3	4	0	1	1	1	1	1	2	2	4
2	2	2	2	2	2	1	0	4	2	2	3	4	0	1	1	1	1	1	1	1	4
2	3	3	2	2	2	1	0	3	2	2	2	4	0	1	1	0	1	1	1	1	3
2	3	3	2	2	2	1	0	2	2	2	3	4	1	1	1	1	1	1	1	1	5
2	3	3	2	2	2	1	0	1	2	2	3	4	0	1	1	1	1	1	1	1	4
2	3	3	2	2	2	1	0	3	2	1	3	4	0	1	0	1	1	1	1	1	3
2	3	3	2	2	2	1	0	4	2	4	3	4	0	1	0	1	1	1	1	1	3
2	3	3	3	3	3	1	0	2	2	4	3	4	1	1	0	1	1	1	1	1	4
2	3	3	2	2	2	1	0	2	2	2	1	4	1	1	1	0	1	1	1	1	4
2	3	3	3	3	3	1	0	5	2	2	3	4	#NULL!	1	1	1	1	1	1	1	#NULL!
2	3	3	3	3	3	1	0	2	3	1	2	1	1	0	0	0	0	2	1	1	1
2	2	2	6	6	3	1	0	2	2	2	3	4	1	1	1	1	1	2	1	1	5
2	2	2	4	4	3	1	0	1	2	2	3	4	0	1	1	1	1	1	1	1	4
2	2	2	3	3	3	1	0	2	2	4	4	1	1	1	0	0	0	1	1	1	2
2	3	3	1	1	1	1	0	2	2	2	3	4	1	1	1	1	1	1	1	1	5
2	2	2	2	2	2	1	0	2	2	2	3	4	1	1	1	1	1	2	1	1	5
2	3	3	4	4	3	1	0	4	1	2	2	4	0	0	1	0	1	2	1	1	2
2	3	3	1	1	1	1	0	3	2	2	1	4	0	1	1	0	1	2	1	1	3
2	3	3	3	3	3	1	0	3	4	2	3	4	0	0	1	1	1	1	1	1	3
2	3	3	3	3	3	1	0	1	3	3	1	5	0	0	0	0	#NULL!	1	1	1	#NULL!
2	2	2	3	3	3	1	0	2	2	4	3	2	1	1	0	1	0	1	2	2	3
2	2	2	1	1	1	1	0	3	4	2	2	4	0	0	1	0	1	1	2	2	2
2	2	2	13	8	3	1	0	2	2	2	3	1	1	1	1	1	0	2	1	1	4
2	3	3	3	3	3	1	0	4	2	1	1	4	0	1	0	0	1	2	1	1	2
2	3	3	2	2	2	1	0	4	4	1	2	1	0	0	0	0	0	2	1	1	0
2	3	3	2	2	2	1	0	2	2	4	3	4	1	1	0	1	1	1	1	1	4
2	3	3	10	8	3	1	0	2	4	2	3	4	1	0	1	1	1	1	2	2	4
2	2	2	1	1	1	1	0	5	5	5	5	5	#NULL!	#NULL!	#NULL!	#NULL!	#NULL!	2	1	1	#NULL!
2	2	2	4	4	3	1	0	4	2	2	3	1	0	1	1	1	0	1	1	1	3
2	2	2	2	2	2	1	0	5	5	5	5	5	#NULL!	#NULL!	#NULL!	#NULL!	#NULL!	1	1	1	#NULL!
2	2	2	1	1	1	1	0	1	4	2	3	5	0	0	1	1	#NULL!	1	1	1	#NULL!
2	2	2	6	6	3	1	0	3	2	3	3	4	0	1	0	1	1	1	1	1	3
2	3	3	1	1	1	1	0	4	2	2	3	4	0	1	1	1	1	2	1	1	4
2	3	3	2	2	2	1	0	3	2	2	4	4	0	1	1	0	1	1	1	1	3
2	3	3	2	2	2	1	0	4	2	1	3	4	0	1	0	1	1	1	1	1	3
2	3	3	3	3	3	1	0	2	2	2	2	4	1	1	1	0	1	1	1	1	4
2	3	3	1	1	1	1	0	2	1	3	3	3	1	0	0	1	0	1	1	1	2
2	4	1	5	5	3	1	0	1	3	2	3	1	0	0	1	1	0	1	1	1	2
2	2	2	2	2	2	1	0	4	2	1	2	4	0	1	0	0	1	2	1	1	2
2	3	3	2	2	2	1	0	4	2	2	2	4	0	1	1	0	1	2	1	1	3
2	3	3	1	1	1	2	0	3	1	2	2	4	0	0	1	0	1	1	1	1	2
2	3	3	1	1	1	2	0	2	2	2	3	4	1	1	1	1	1	1	1	1	5
2	2	2	2	2	2	2	0	4	2	4	3	4	0	1	0	1	1	1	1	1	3
2	3	3	1	1	1	2	0	1	4	2	1	4	0	0	1	0	1	1	1	1	2
2	2	2	2	2	2	2	0	3	1	2	3	4	0	0	1	1	1	1	1	1	3
2	3	3	2	2	2	2	0	5	5	1	1	1	#NULL!	#NULL!	0	0	0	1	1	1	#NULL!
2	3	3	5	5	3	2	0	3	2	4	3	4	0	1	0	1	1	1	1	1	3
2	3	3	1	1	1	2	0	5	5	5	5	5	#NULL!	#NULL!	#NULL!	#NULL!	#NULL!	1	1	1	#NULL!
2	2	2	1	1	1	1	0	3	2	3	3	4	0	1	0	1	1	1	1	1	3
2	2	2	2	2	2	1	0	2	2	1	3	4	1	1	0	1	1	1	1	1	4
2	2	2	1	1	1	1	0	2	2	2	3	4	1	1	1	1	1	1	2	2	5
2	2	2	1	1	1	1	0	4	2	2	1	1	0	1	1	0	0	1	2	2	2
2	2	2	1	1	1	1	0	2	2	2	3	4	1	1	1	1	1	2	1	1	5
2	3	3	2	2	2	1	0	5	5	5	5	5	#NULL!	#NULL!	#NULL!	#NULL!	#NULL!	1	1	1	#NULL!
2	3	3	1	1	1	1	0	5	5	5	5	5	#NULL!	#NULL!	#NULL!	#NULL!	#NULL!	1	1	1	#NULL!
2	3	3	1	1	1	1	0	4	2	2	3	1	0	1	1	1	0	1	1	1	3
2	3	3	1	1	1	1	0	3	2	2	3	4	0	1	1	1	1	1	2	2	4
2	3	3	2	2	2	1	0	5	5	5	5	5	#NULL!	#NULL!	#NULL!	#NULL!	#NULL!	1	2	2	#NULL!
2	3	3	2	2	2	1	0	2	2	2	3	1	1	1	1	1	0	1	2	2	4
2	2	2	2	2	2	1	0	3	2	2	2	4	0	1	1	0	1	2	1	1	3
2	2	2	1	1	1	1	0	2	2	2	3	4	1	1	1	1	1	2	1	1	5
2	2	2	1	1	1	1	0	1	2	1	4	4	0	1	0	0	1	1	1	1	2
2	3	3	2	2	2	1	0	3	2	2	2	1	0	1	1	0	0	1	1	1	2
2	3	3	2	2	2	1	0	4	2	3	3	4	0	1	0	1	1	2	1	1	3
2	3	3	1	1	1	1	0	1	2	2	3	4	0	1	1	1	1	2	1	1	4
2	2	2	4	4	3	1	0	3	2	1	3	4	0	1	0	1	1	1	1	1	3
2	2	2	2	2	2	1	0	2	2	2	3	4	1	1	1	1	1	1	1	1	5
2	2	2	3	3	3	1	0	3	2	3	3	4	0	1	0	1	1	2	1	1	3
2	2	2	1	1	1	1	0	2	1	1	1	4	1	0	0	0	1	1	1	1	2
2	2	2	3	3	3	1	0	1	4	2	4	1	0	0	1	0	0	1	1	1	1
2	2	2	1	1	1	1	0	2	2	2	2	4	1	1	1	0	1	1	1	1	4
2	2	2	2	2	2	1	0	2	2	2	3	1	1	1	1	1	0	1	1	1	4
2	3	3	1	1	1	1	0	2	2	2	3	1	1	1	1	1	0	2	2	2	4
2	3	3	6	6	3	1	0	3	2	2	2	4	0	1	1	0	1	2	1	1	3
2	3	3	5	5	3	1	0	2	2	4	3	4	1	1	0	1	1	1	1	1	4
2	2	2	6	6	3	1	0	2	2	2	3	1	1	1	1	1	0	1	1	1	4
2	3	3	3	3	3	1	0	3	2	2	3	4	0	1	1	1	1	1	1	1	4
2	3	3	14	8	3	3	0	4	4	2	3	4	0	0	1	1	1	2	2	2	3
2	3	3	6	6	3	3	0	2	2	3	3	1	1	1	0	1	0	2	2	2	3
2	2	2	16	8	3	3	0	2	2	1	3	4	1	1	0	1	1	1	2	2	4
2	3	3	10	8	3	3	0	3	2	1	3	4	0	1	0	1	1	2	2	2	3
2	3	3	2	2	2	1	1	3	2	2	3	4	0	1	1	1	1	1	1	1	4
2	3	3	1	1	1	1	1	2	2	2	3	4	1	1	1	1	1	1	1	1	5
2	3	3	4	4	3	1	1	2	2	2	3	4	1	1	1	1	1	2	1	1	5
2	3	3	2	2	2	1	1	2	2	2	1	1	1	1	1	0	0	2	2	2	3
2	3	3	1	1	1	1	1	1	2	1	1	1	0	1	0	0	0	2	1	1	1
2	3	3	3	3	3	1	1	2	2	4	2	4	1	1	0	0	1	2	1	1	3
2	3	3	2	2	2	1	1	3	2	2	2	3	0	1	1	0	0	2	1	1	2
2	2	2	2	2	2	1	1	2	1	2	2	2	1	0	1	0	0	2	1	1	2
2	2	2	1	1	1	1	1	3	1	4	3	4	0	0	0	1	1	2	1	1	2
2	3	3	3	3	3	1	1	5	5	5	5	5	#NULL!	#NULL!	#NULL!	#NULL!	#NULL!	2	1	1	#NULL!
2	3	3	2	2	2	1	1	2	2	4	3	1	1	1	0	1	0	2	1	1	3
2	3	3	3	3	3	1	1	2	2	1	2	4	1	1	0	0	1	2	1	1	3
2	3	3	2	2	2	1	1	4	4	5	5	5	0	0	#NULL!	#NULL!	#NULL!	2	1	1	#NULL!
2	3	3	1	1	1	1	1	2	2	2	3	4	1	1	1	1	1	2	1	1	5
2	3	3	4	4	3	1	1	1	2	2	1	4	0	1	1	0	1	1	1	1	3
2	3	3	2	2	2	1	1	2	2	2	3	4	1	1	1	1	1	1	1	1	5
2	3	3	1	1	1	1	1	1	2	2	3	3	0	1	1	1	0	2	2	2	3
2	3	3	6	6	3	1	1	2	2	2	4	4	1	1	1	0	1	2	1	1	4
2	3	3	2	2	2	1	1	3	2	1	3	3	0	1	0	1	0	1	1	1	2
2	3	3	3	3	3	1	1	3	2	2	2	4	0	1	1	0	1	1	1	1	3
2	3	3	1	1	1	1	1	3	2	2	4	4	0	1	1	0	1	2	1	1	3
2	3	3	2	2	2	1	1	3	4	2	3	1	0	0	1	1	0	2	1	1	2
2	2	2	1	1	1	1	1	2	2	4	3	4	1	1	0	1	1	1	1	1	4
2	3	3	2	2	2	1	1	2	2	2	3	4	1	1	1	1	1	1	1	1	5
2	3	3	1	1	1	1	1	4	2	2	3	4	0	1	1	1	1	2	1	1	4
2	3	3	1	1	1	1	1	2	2	2	3	4	1	1	1	1	1	2	1	1	5
2	3	3	1	1	1	1	1	2	1	2	3	4	1	0	1	1	1	2	1	1	4
2	3	3	1	1	1	1	1	2	2	4	3	1	1	1	0	1	0	2	1	1	3
2	2	2	1	1	1	2	1	3	2	4	3	4	0	1	0	1	1	2	2	2	3
2	2	2	1	1	1	2	1	2	2	4	1	4	1	1	0	0	1	2	2	2	3
2	2	2	1	1	1	2	1	4	2	4	3	1	0	1	0	1	0	2	2	2	2
2	2	2	3	3	3	2	1	5	5	5	5	5	#NULL!	#NULL!	#NULL!	#NULL!	#NULL!	2	2	2	#NULL!
2	2	2	1	1	1	2	1	2	2	2	3	2	1	1	1	1	0	2	2	2	4
2	2	2	2	2	2	2	1	2	4	2	2	4	1	0	1	0	1	2	2	2	3
2	3	3	2	2	2	2	1	2	1	1	2	2	1	0	0	0	0	2	2	2	1
2	3	3	1	1	1	2	1	4	2	2	3	4	0	1	1	1	1	2	2	2	4
2	3	3	5	5	3	2	1	2	2	2	3	4	1	1	1	1	1	2	2	2	5
2	3	3	1	1	1	2	1	3	1	3	5	1	0	0	0	#NULL!	0	2	2	2	#NULL!
2	3	3	2	2	2	2	1	4	2	2	3	4	0	1	1	1	1	2	2	2	4
2	3	3	1	1	1	2	1	3	2	4	3	4	0	1	0	1	1	2	2	2	3
2	3	3	2	2	2	2	1	2	2	2	3	4	1	1	1	1	1	2	2	2	5
2	3	3	3	3	3	2	1	4	2	3	2	4	0	1	0	0	1	2	2	2	2
2	3	3	2	2	2	2	1	4	2	2	3	1	0	1	1	1	0	2	2	2	3
2	3	3	1	1	1	2	1	5	2	2	3	4	#NULL!	1	1	1	1	2	2	2	#NULL!
2	3	3	1	1	1	2	1	4	2	3	3	4	0	1	0	1	1	2	2	2	3
2	3	3	4	4	3	2	1	2	1	2	2	4	1	0	1	0	1	2	2	2	3
2	3	3	1	1	1	2	1	3	3	3	1	3	0	0	0	0	0	2	2	2	0
2	3	3	1	1	1	2	1	2	2	2	2	3	1	1	1	0	0	2	2	2	3
2	3	3	1	1	1	2	1	2	2	2	1	5	1	1	1	0	#NULL!	1	1	1	#NULL!
2	2	2	1	1	1	1	1	5	5	5	5	5	#NULL!	#NULL!	#NULL!	#NULL!	#NULL!	1	1	1	#NULL!
2	2	2	2	2	2	1	1	2	2	2	3	4	1	1	1	1	1	2	1	1	5
2	3	3	2	2	2	1	1	2	2	3	2	4	1	1	0	0	1	1	1	1	3
2	3	3	1	1	1	1	1	2	2	2	3	4	1	1	1	1	1	1	1	1	5
2	3	3	1	1	1	1	1	1	3	3	1	1	0	0	0	0	0	1	1	1	0
2	3	3	1	1	1	1	1	4	2	2	2	4	0	1	1	0	1	1	1	1	3
2	3	3	11	8	3	1	1	3	1	2	1	4	0	0	1	0	1	2	1	1	2
2	3	3	1	1	1	1	1	4	1	2	3	4	0	0	1	1	1	2	1	1	3
2	3	3	1	1	1	1	1	2	1	2	2	4	1	0	1	0	1	2	1	1	3
2	3	3	1	1	1	1	1	2	2	2	4	4	1	1	1	0	1	2	1	1	4
2	3	3	1	1	1	1	1	1	4	2	3	4	0	0	1	1	1	2	1	1	3
2	3	3	1	1	1	1	1	4	2	4	3	4	0	1	0	1	1	2	1	1	3
2	2	2	1	1	1	1	1	2	2	2	3	4	1	1	1	1	1	1	1	1	5
2	2	2	1	1	1	1	1	5	5	5	5	5	#NULL!	#NULL!	#NULL!	#NULL!	#NULL!	2	1	1	#NULL!
2	2	2	2	2	2	1	1	3	4	2	3	4	0	0	1	1	1	2	1	1	3
2	3	3	2	2	2	1	1	2	2	3	3	4	1	1	0	1	1	2	1	1	4
2	3	3	1	1	1	1	1	4	2	3	2	4	0	1	0	0	1	1	1	1	2
2	3	3	2	2	2	1	1	1	2	2	2	4	0	1	1	0	1	1	1	1	3
2	3	3	2	2	2	1	1	2	3	3	3	4	1	0	0	1	1	1	1	1	3
2	3	3	1	1	1	1	1	1	2	3	2	4	0	1	0	0	1	2	1	1	2
2	3	3	1	1	1	1	1	4	2	2	1	4	0	1	1	0	1	2	1	1	3
2	3	3	1	1	1	1	1	2	2	2	3	1	1	1	1	1	0	2	1	1	4
2	3	3	1	1	1	1	1	2	2	2	2	4	1	1	1	0	1	2	1	1	4
2	2	2	2	2	2	1	1	3	4	2	3	4	0	0	1	1	1	2	2	2	3
2	3	3	1	1	1	1	1	2	2	4	3	4	1	1	0	1	1	2	1	1	4
2	3	3	1	1	1	1	1	2	2	2	3	4	1	1	1	1	1	1	1	1	5
2	3	3	2	2	2	1	1	4	2	1	1	4	0	1	0	0	1	2	1	1	2
2	3	3	1	1	1	1	1	3	2	1	3	4	0	1	0	1	1	2	1	1	3
2	3	3	1	1	1	1	1	3	4	3	2	2	0	0	0	0	0	2	1	1	0
2	3	3	3	3	3	1	1	3	2	4	3	1	0	1	0	1	0	2	1	1	2
2	3	3	3	3	3	1	1	2	4	4	3	4	1	0	0	1	1	2	1	1	3
2	2	2	2	2	2	1	1	2	2	2	3	4	1	1	1	1	1	2	1	1	5
2	3	3	6	6	3	1	1	2	2	4	1	4	1	1	0	0	1	2	1	1	3
2	2	2	1	1	1	1	1	1	1	1	3	4	0	0	0	1	1	1	1	1	2
2	2	2	1	1	1	1	1	2	2	1	3	4	1	1	0	1	1	1	1	1	4
2	3	3	2	2	2	1	1	2	2	2	3	4	1	1	1	1	1	1	1	1	5
2	3	3	1	1	1	1	1	4	4	2	3	4	0	0	1	1	1	1	1	1	3
2	3	3	1	1	1	1	1	5	5	5	5	5	#NULL!	#NULL!	#NULL!	#NULL!	#NULL!	1	1	1	#NULL!
2	3	3	2	2	2	1	1	4	2	2	2	2	0	1	1	0	0	1	1	1	2
2	3	3	1	1	1	1	1	4	2	2	4	1	0	1	1	0	0	1	1	1	2
2	3	3	1	1	1	1	1	2	2	2	3	4	1	1	1	1	1	1	1	1	5
2	3	3	1	1	1	1	1	2	2	2	1	1	1	1	1	0	0	2	1	1	3
2	3	3	1	1	1	1	1	3	1	2	1	4	0	0	1	0	1	1	1	1	2
2	3	3	1	1	1	1	1	3	2	1	3	4	0	1	0	1	1	1	1	1	3
2	3	3	2	2	2	1	1	3	4	2	2	1	0	0	1	0	0	1	1	1	1
2	3	3	8	8	3	1	1	2	2	2	3	3	1	1	1	1	0	1	1	1	4
2	1	1	1	1	1	1	1	4	2	2	2	1	0	1	1	0	0	1	1	1	2
2	2	2	1	1	1	1	1	3	2	2	2	4	0	1	1	0	1	1	1	1	3
2	2	2	1	1	1	1	1	2	2	2	3	4	1	1	1	1	1	1	2	2	5
