# Supplementary material for: Clinical Research Knowledge of Medical Graduates in Japan: A Pilot Study
Source: Research Square preprint supplement (doi:10.21203/rs.3.rs-7699884/v1), 2025-12-01
Supplement: Supplementary file 5 [file e66ca1cb15000879188f33db.docx]

STROBE Statement—Checklist of items that should be included in reports of cross-sectional studies

| Item No | Recommendation | Location in manuscript |
| --- | --- | --- |
| 1 | Indicate the study’s design with a commonly used term in the title or the abstract | Title page, Abstract (p. 1) |
| 2 | Explain the scientific background and rationale for the investigation being reported | Introduction (pp. 2–3) |
| 3 | State specific objectives, including any prespecified hypotheses | Introduction, last para (p. 4) |
| 4 | Present key elements of study design early in the paper | Methods, Design (p. 5) |
| 5 | Describe the setting, locations, and relevant dates, including periods of recruitment, exposure, follow-up, and data collection | Methods, Participants & Data collection (pp. 5–6) |
| 6 | Give the eligibility criteria, and the sources and methods of selection of participants | Methods, Participants (p. 5) |
| 7 | Clearly define all outcomes, exposures, predictors, potential confounders, and effect modifiers. Give diagnostic criteria, if applicable | Methods, Variables (pp. 5–6) |
| 8 | For each variable of interest, give sources of data and details of methods of assessment (measurement) | Methods, Variables & Data collection (pp. 5–6) |
| 9 | Describe any efforts to address potential sources of bias | Methods, Data collection; Limitations (pp. 5–6; 14) |
| 10 | Explain how the study size was arrived at | Methods, Participants (pp. 5–6) |
| 11 | Explain how quantitative variables were handled in the analyses. If applicable, describe which groupings were chosen and why | Methods, Data analysis (pp. 5–7) |
| 12 | Describe all statistical methods, including those used to control for confounding | Methods, Data analysis (pp. 5–7) |
| 12.1 | Describe any methods used to examine subgroups and interactions | Methods, Data analysis (pp. 5–6) |
| 12.2 | Explain how missing data were addressed | Methods, Data analysis (pp. 5–6); Limitations (p. 14) |
| 12.3 | If applicable, describe analytical methods taking account of sampling strategy | N/A (not applicable) |
| 12.4 | Describe any sensitivity analyses | Methods, Data analysis (pp. 5–6); Results (pp. 7–9) |
| 13 | Report numbers of individuals at each stage of study—e.g., numbers potentially eligible, examined for eligibility, confirmed eligible, included in the study, completing follow-up, and analyzed | Results, Participants (p. 7), Figure 1 |
| 13.1 | Give reasons for non-participation at each stage | Results, Participants (pp. 7); Methods (p. 5) |
| 13.2 | Consider use of a flow diagram | Flow diagram not included, as the exclusion process was simple and is clearly described in text. |
| 14 | Give characteristics of study participants (e.g., demographic, clinical, social) and information on exposures and potential confounders | Table 1 (p. 20-22), Results (pp. 7–9) |
| 14.1 | Indicate number of participants with missing data for each variable of interest | Table 1 (p. 20-22), Results (pp. 7–9); Limitations (p. 14) |
| 15 | Report numbers of outcome events or summary measures | Results, Table 2, Table 3  (pp. 9, 23) |
| 16 | Give unadjusted estimates and, if applicable, confounder-adjusted estimates and their precision (e.g., 95% confidence interval). Make clear which confounders were adjusted for and why they were included | Results, Table 2, Table 3 (pp. 9, 23) |
| 16.1 | Report category boundaries when continuous variables were categorized | Methods, Variables (p. 5–6); Table 1 (p. 19) |
| 16.2 | If relevant, consider translating estimates of relative risk into absolute risk for a meaningful time period | N/A (cross-sectional, not longitudinal) |
| 17 | Report other analyses done—e.g., analyses of subgroups and interactions, and sensitivity analyses | Results, Table S1 (Supplementary), p. 11 |
| 18 | Summarize key results with reference to study objectives | Discussion, first para (p. 9) |
| 19 | Discuss limitations of the study, taking into account sources of potential bias or imprecision. Discuss both direction and magnitude of any potential bias | Discussion, Limitations (pp. 9, 13) |
| 20 | Give a cautious overall interpretation of results considering objectives, limitations, multiplicity of analyses, results from similar studies, and other relevant evidence | Discussion, Interpretation (pp. 9–14) |
| 21 | Discuss the generalizability (external validity) of the study results | Discussion, last para (pp. 14) |
| 22 | Give the source of funding and the role of the funders for the present study and, if applicable, for the original study on which the present article is based | Funding (p.15) |
